# Supplementary figures and images for: Bystander B cells rapidly acquire antigen receptors from activated B cells by membrane transfer
Source: HighWire-hosted journal article supplement (doi:10.1073/pnas.0800259105), 2008-03-12

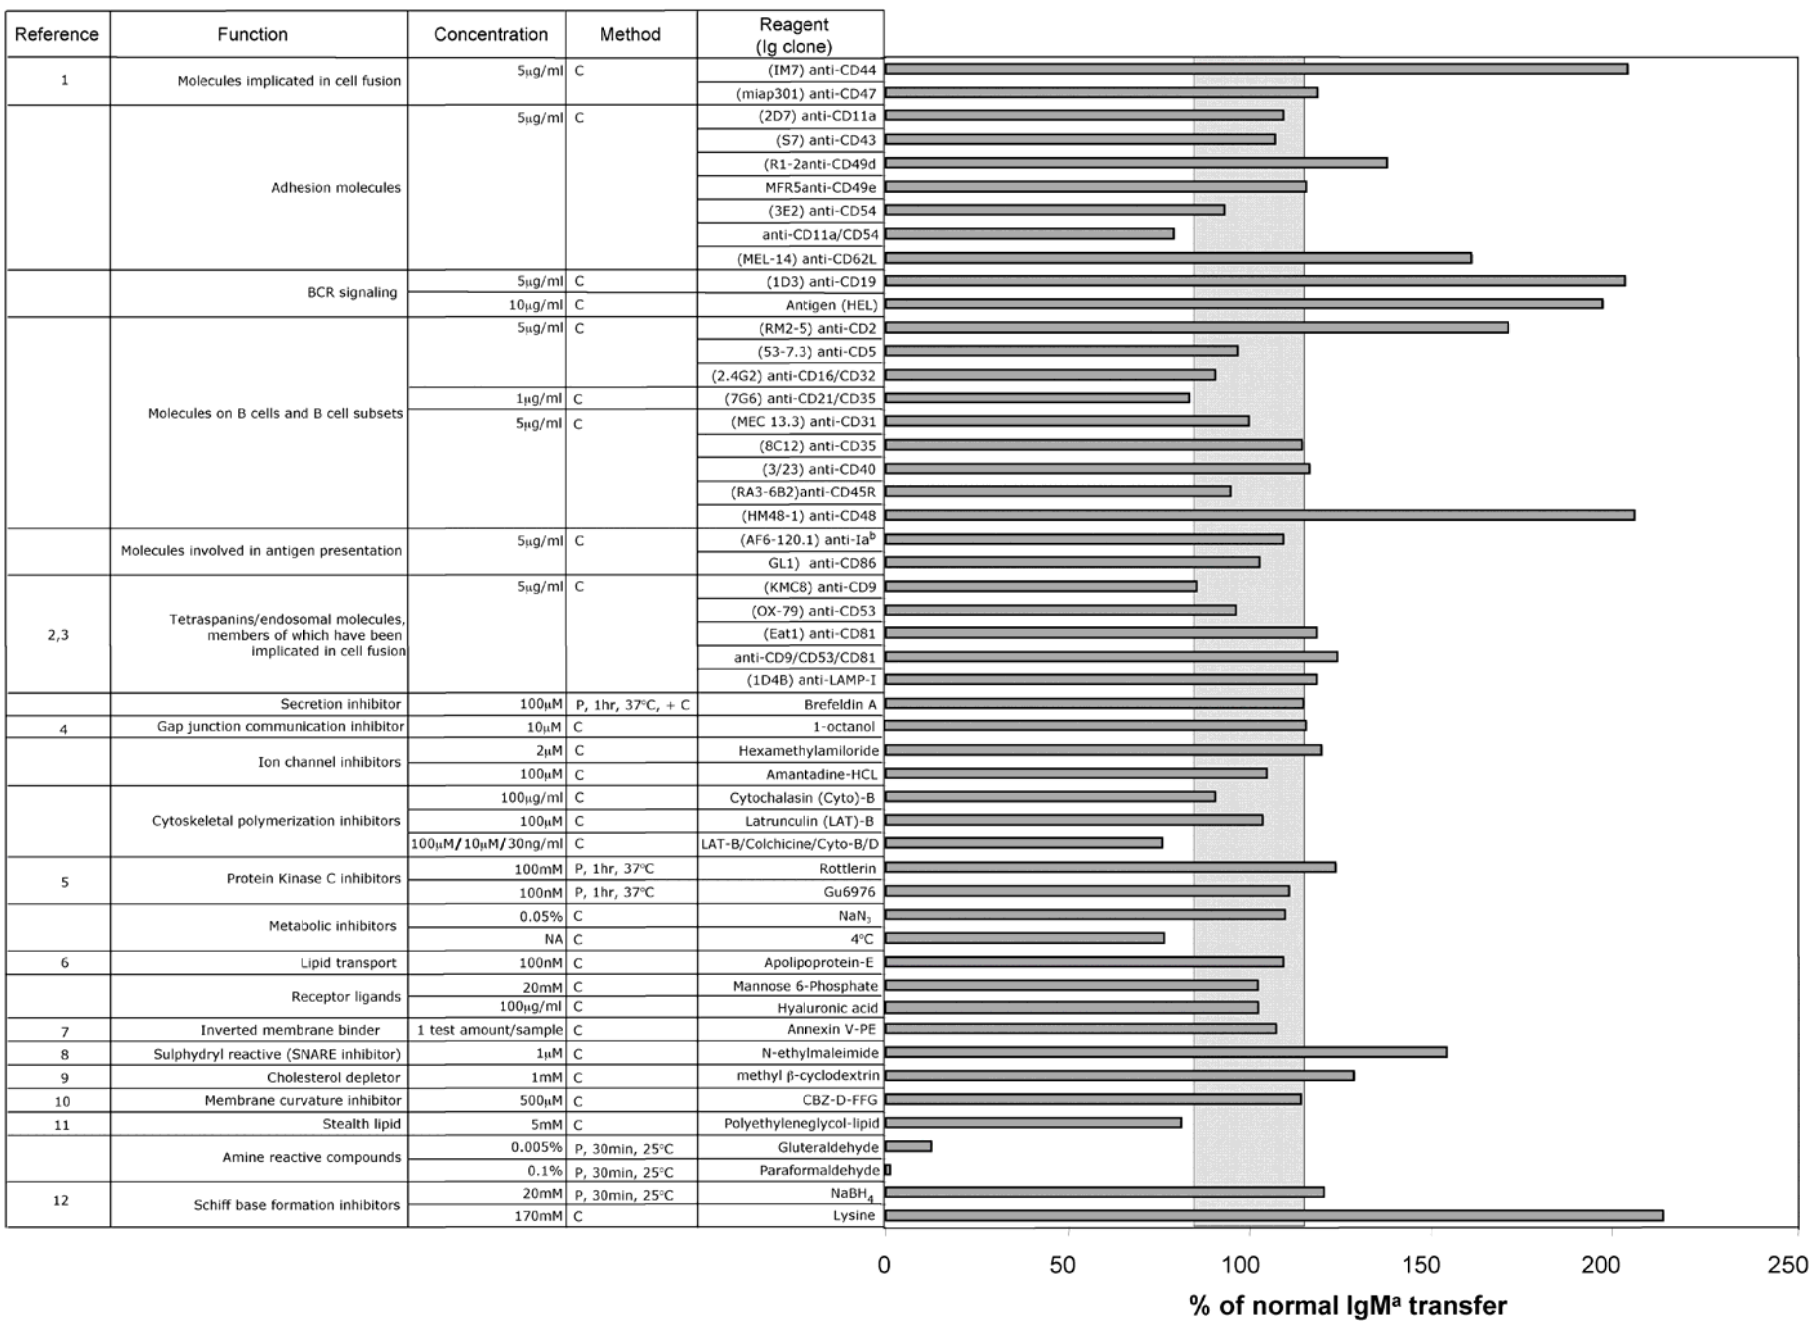

Supplement: 00259Fig11.pdf [file 00259Fig11.pdf]

A

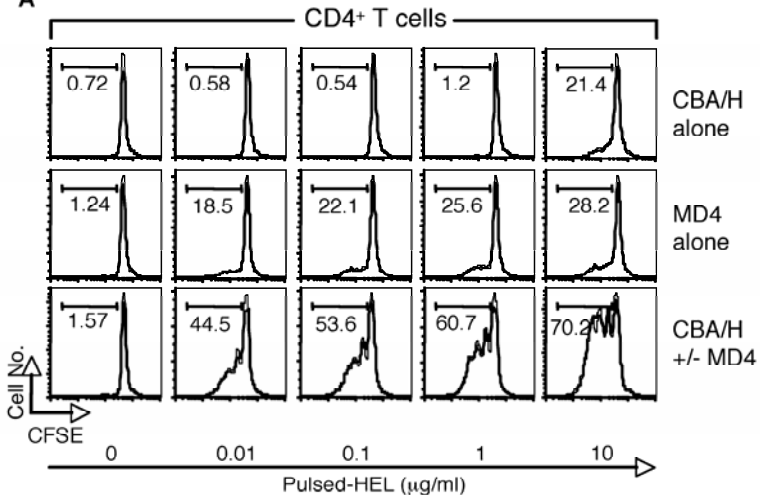

Supplement: 00259Fig12a.pdf [file 00259Fig12a.pdf]

MD4

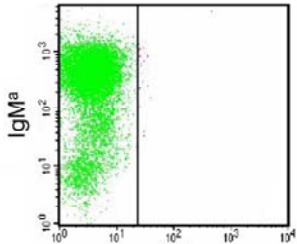

MD4+B6.CD45.1

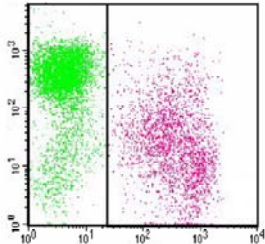

B6.CD45.1

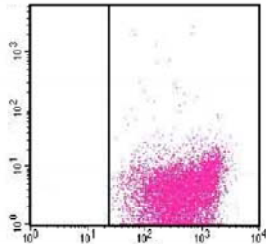

CFSE

Supplement: 00259Fig7a.pdf [file 00259Fig7a.pdf]
